# Supplementary material
Source: PubMed Central journal article supplement (PMC3258337)

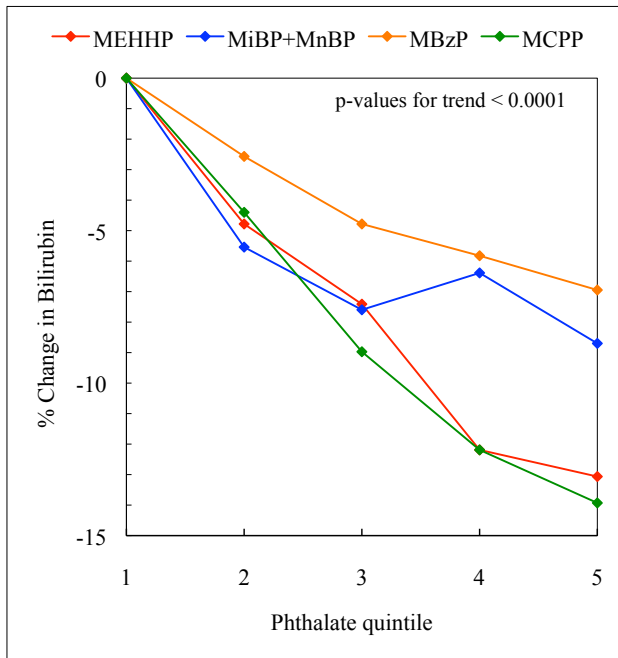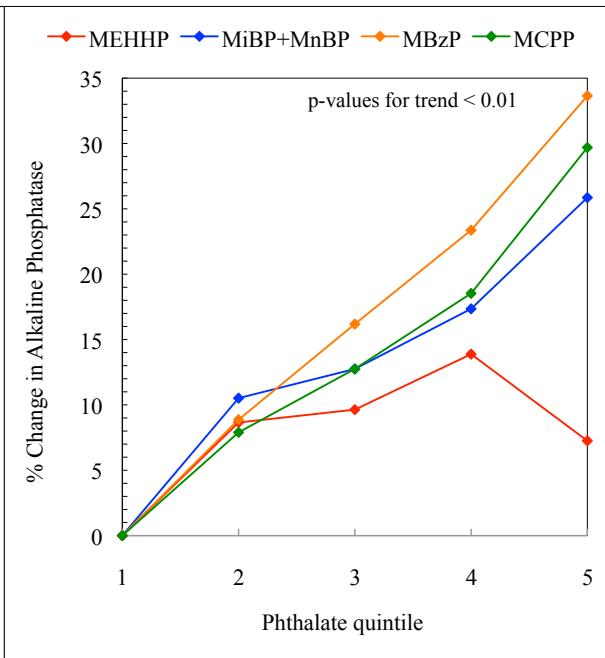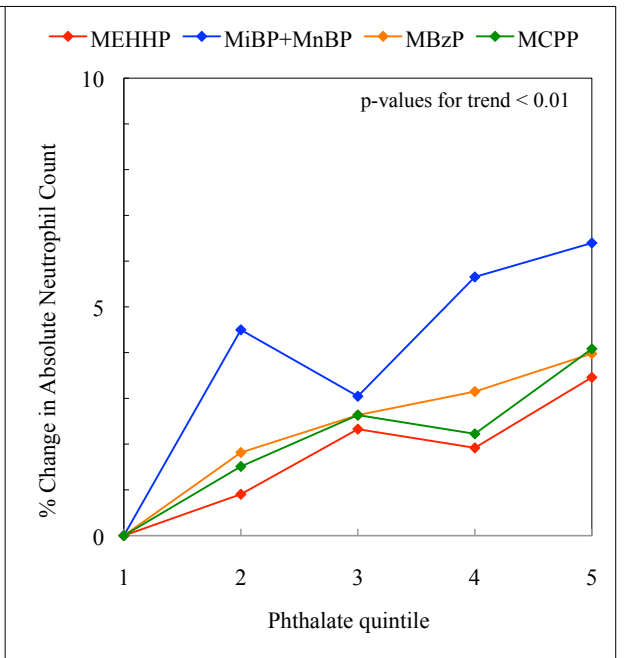

Supplement: NIHMS339477-supplement-1_si_001.pdf [file NIHMS339477-supplement-1_si_001.pdf]
